# Supplementary material for: Longitudinal analysis reveals elevation then sustained higher expression of autoantibodies for six months after SARS-CoV-2 infection
Source: bioRxiv or medRxiv preprint supplement (doi:10.1101/2022.05.04.22274681), 2022-05-07
Supplement: Supplementary file [file media-1.pdf]

**Supplemental Table 1. Multiple Linear Regression: ≤30 days post-SARS-CoV-2 symptom onset**

| AAB                     | Variable                   | Estimate | 95% CI (asymptotic)    | P value | P value summary |
|-------------------------|----------------------------|----------|------------------------|---------|-----------------|
| <b>SSA/Ro60</b>         |                            |          |                        |         |                 |
| β0                      | Intercept                  | 1.68     | 1.486 to 1.875         | <0.0001 | ****            |
| β1                      | SARS-CoV-2                 | 0.2011   | 0.0009555 to 0.4013    | 0.0489  | *               |
| β2                      | Sex: Female                | -0.2313  | -0.4473 to -0.01525    | 0.0361  | *               |
| β3                      | Race: White                | -0.1901  | -0.3949 to 0.01466     | 0.0684  | ns              |
| β4                      | Ethnicity: Hispanic/Latino | -0.2445  | -0.5428 to 0.05381     | 0.1071  | ns              |
| β5                      | Lung Disease               | 0.2659   | 0.02635 to 0.5055      | 0.03    | *               |
| β6                      | Immunosuppressed           | -0.2912  | -0.6177 to 0.03527     | 0.0798  | ns              |
| <b>SSB/La</b>           |                            |          |                        |         |                 |
| β0                      | Intercept                  | 1.668    | 1.505 to 1.831         | <0.0001 | ****            |
| β1                      | SARS-CoV-2                 | 0.3131   | 0.07997 to 0.5463      | 0.009   | **              |
| β2                      | Heart Disease              | 0.3233   | 0.01018 to 0.6365      | 0.0431  | *               |
| β3                      | Immunosuppressed           | -0.2845  | -0.6659 to 0.09689     | 0.142   | ns              |
| <b>RNP/Sm</b>           |                            |          |                        |         |                 |
| β0                      | Intercept                  | 1.305    | 1.157 to 1.452         | <0.0001 | ****            |
| β1                      | SARS-CoV-2                 | 0.2857   | 0.07484 to 0.4966      | 0.0084  | **              |
| β2                      | Heart Disease              | 0.265    | -0.01820 to 0.5482     | 0.0663  | ns              |
| β3                      | Immunosuppressed           | -0.4536  | -0.7984 to -0.1087     | 0.0105  | *               |
| <b>Sm</b>               |                            |          |                        |         |                 |
| β0                      | Intercept                  | 2.056    | 1.902 to 2.209         | <0.0001 | ****            |
| β1                      | SARS-CoV-2                 | 0.2178   | 0.003095 to 0.4325     | 0.0468  | *               |
| β2                      | Heart Disease              | 0.3153   | 0.02574 to 0.6049      | 0.0331  | *               |
| β3                      | Lung Disease               | 0.1824   | -0.06693 to 0.4317     | 0.1498  | ns              |
| β4                      | Immunosuppressed           | -0.5201  | -0.8721 to -0.1681     | 0.0042  | **              |
| <b>Proteinase 3</b>     |                            |          |                        |         |                 |
| β0                      | Intercept                  | 2.019    | 1.774 to 2.263         | <0.0001 | ****            |
| β1                      | SARS-CoV-2                 | 0.432    | 0.2892 to 0.5748       | <0.0001 | ****            |
| β2                      | Age                        | -0.00364 | -0.007816 to 0.0005340 | 0.0867  | ns              |
| β3                      | Sex: Female                | -0.1587  | -0.2993 to -0.01798    | 0.0275  | *               |
| β4                      | Race: Black                | 0.1851   | 0.04975 to 0.3204      | 0.0079  | **              |
| β5                      | HIV                        | 0.2106   | 0.02374 to 0.3975      | 0.0276  | *               |
| β6                      | Immunosuppressed           | -0.2112  | -0.4285 to 0.006177    | 0.0567  | ns              |
| <b>Myeloperoxidase</b>  |                            |          |                        |         |                 |
| β0                      | Intercept                  | 0.9201   | 0.5877 to 1.252        | <0.0001 | ****            |
| β1                      | SARS-CoV-2                 | 0.378    | 0.2100 to 0.5461       | <0.0001 | ****            |
| β2                      | Age                        | 0.004616 | -0.0008467 to 0.01008  | 0.0967  | ns              |
| β3                      | Sex: Female                | -0.167   | -0.3482 to 0.01424     | 0.0705  | ns              |
| β4                      | Race: White                | -0.1576  | -0.3229 to 0.007706    | 0.0614  | ns              |
| β5                      | Lung Disease               | 0.296    | 0.09918 to 0.4928      | 0.0036  | **              |
| β6                      | Autoimmune                 | 0.3435   | 0.1323 to 0.5547       | 0.0017  | **              |
| β7                      | Immunosuppressed           | -0.4635  | -0.7245 to -0.2024     | 0.0007  | ***             |
| β8                      | Hypertension               | -0.1903  | -0.3896 to 0.009076    | 0.0612  | ns              |
| <b>B-2-Glycoprotein</b> |                            |          |                        |         |                 |
| β0                      | Intercept                  | 1.492    | 1.150 to 1.835         | <0.0001 | ****            |
| β1                      | SARS-CoV-2                 | 0.2997   | 0.1007 to 0.4987       | 0.0035  | **              |
| β2                      | Age                        | 0.00586  | 2.735e-005 to 0.01169  | 0.049   | *               |
| β3                      | HIV                        | 0.2454   | -0.01860 to 0.5094     | 0.0681  | ns              |
| <b>CENP-A</b>           |                            |          |                        |         |                 |
| β0                      | Intercept                  | 2.612    | 2.389 to 2.836         | <0.0001 | ****            |
| β1                      | SARS-CoV-2                 | 0.1824   | -0.06095 to 0.4257     | 0.1401  | ns              |
| β2                      | Race: White                | -0.2612  | -0.5029 to -0.01959    | 0.0344  | *               |
| β3                      | Heart Disease              | 0.3788   | 0.05359 to 0.7040      | 0.0229  | *               |
| β4                      | Autoimmune                 | 0.2852   | -0.01848 to 0.5889     | 0.0654  | ns              |
| β5                      | Immunosuppressed           | -0.367   | -0.7588 to 0.02476     | 0.066   | ns              |
| <b>CENP-B</b>           |                            |          |                        |         |                 |
| β0                      | Intercept                  | 1.526    | 1.234 to 1.818         | <0.0001 | ****            |
| β1                      | SARS-CoV-2                 | 0.4495   | 0.09084 to 0.8082      | 0.0146  | *               |
| β2                      | Sex: Female                | -0.3555  | -0.7202 to 0.009142    | 0.0559  | ns              |
| β3                      | Ethnicity: Hispanic/Latino | 0.3737   | -0.1114 to 0.8587      | 0.1295  | ns              |
| β4                      | HIV                        | 0.6565   | 0.1900 to 1.123        | 0.0063  | **              |
| β5                      | Lung Disease               | 0.4236   | 0.02204 to 0.8251      | 0.0389  | *               |
| β6                      | Immunosuppressed           | -0.376   | -0.9135 to 0.1614      | 0.1682  | ns              |
| <b>Scl--70</b>          |                            |          |                        |         |                 |
| β0                      | Intercept                  | 2.202    | 2.047 to 2.357         | <0.0001 | ****            |
| β1                      | SARS-CoV-2                 | 0.1669   | -0.03804 to 0.3717     | 0.1093  | ns              |
| β2                      | Ethnicity: Hispanic/Latino | 0.229    | -0.06529 to 0.5233     | 0.1258  | ns              |
| β3                      | Hypertension               | 0.2405   | 0.03018 to 0.4508      | 0.0254  | *               |
| <b>Jo-1</b>             |                            |          |                        |         |                 |
| β0                      | Intercept                  | 2.099    | 1.902 to 2.296         | <0.0001 | ****            |
| β1                      | SARS-CoV-2                 | 0.6084   | 0.3663 to 0.8505       | <0.0001 | ****            |
| β2                      | HIV                        | 0.5682   | 0.2554 to 0.8811       | 0.0005  | ***             |
| β3                      | DM                         | -0.3907  | -0.7023 to -0.07907    | 0.0145  | *               |
| β4                      | Heart Disease              | 0.253    | -0.07959 to 0.5857     | 0.1343  | ns              |

|              |                  |         |                     |         |      |
|--------------|------------------|---------|---------------------|---------|------|
| $\beta_5$    | Lung Disease     | 0.2655  | 0.0009944 to 0.5300 | 0.0492  | *    |
| $\beta_6$    | Immunosuppressed | -0.7157 | -1.088 to -0.3430   | 0.0002  | ***  |
| $\beta_7$    | Hypertension     | 0.2666  | -0.01109 to 0.5442  | 0.0597  | ns   |
| <b>Ku</b>    |                  |         |                     |         |      |
| $\beta_0$    | Intercept        | 2.286   | 2.115 to 2.456      | <0.0001 | **** |
| $\beta_1$    | SARS-CoV-2       | 0.3736  | 0.1430 to 0.6042    | 0.0018  | **   |
| $\beta_2$    | Immunosuppressed | -0.5398 | -0.9009 to -0.1788  | 0.0038  | **   |
| $\beta_3$    | Hypertension     | 0.3577  | 0.1186 to 0.5968    | 0.0037  | **   |
| <b>PL-12</b> |                  |         |                     |         |      |
| $\beta_0$    | Intercept        | 2.088   | 1.906 to 2.271      | <0.0001 | **** |
| $\beta_1$    | SARS-CoV-2       | 0.4864  | 0.2596 to 0.7132    | <0.0001 | **** |
| $\beta_2$    | Sex: Female      | -0.3525 | -0.5823 to -0.1226  | 0.003   | **   |
| $\beta_3$    | HIV              | 0.4416  | 0.1440 to 0.7392    | 0.004   | **   |
| $\beta_4$    | Lung Disease     | 0.2938  | 0.03958 to 0.5479   | 0.0239  | *    |

**Supplemental Table 2. Multiple Linear Regression:  $\geq 90$  days post-SARS-CoV-2 symptom onset**

| AAB                     | Variable                   | Estimate | 95% CI (asymptotic)  | P value | P value summary |
|-------------------------|----------------------------|----------|----------------------|---------|-----------------|
| <b>SSB/La</b>           |                            |          |                      |         |                 |
| $\beta_0$               | Intercept                  | 1.286    | 0.8832 to 1.688      | <0.0001 | ****            |
| $\beta_1$               | SARS-CoV-2                 | 0.4551   | 0.2182 to 0.6920     | 0.0002  | ***             |
| $\beta_2$               | Race: White                | 0.379    | -0.003725 to 0.7617  | 0.0522  | ns              |
| $\beta_3$               | Race: Black                | 0.4995   | 0.07138 to 0.9276    | 0.0227  | *               |
| $\beta_4$               | DM                         | 0.3125   | -0.03056 to 0.6556   | 0.0737  | ns              |
| $\beta_5$               | Hypertension               | -0.2559  | -0.5504 to 0.03854   | 0.0877  | ns              |
| <b>RNP/Sm</b>           |                            |          |                      |         |                 |
| $\beta_0$               | Intercept                  | 1.544    | 1.185 to 1.902       | <0.0001 | ****            |
| $\beta_1$               | SARS-CoV-2                 | 0.2544   | 0.04861 to 0.4602    | 0.0159  | *               |
| $\beta_2$               | Age                        | -0.00458 | -0.01085 to 0.001693 | 0.1507  | ns              |
| <b>Sm</b>               |                            |          |                      |         |                 |
| $\beta_0$               | Intercept                  | 2.088    | 1.946 to 2.229       | <0.0001 | ****            |
| $\beta_1$               | SARS-CoV-2                 | 0.2672   | 0.06707 to 0.4673    | 0.0094  | **              |
| <b>Proteinase 3</b>     |                            |          |                      |         |                 |
| $\beta_0$               | Intercept                  | 1.988    | 1.855 to 2.122       | <0.0001 | ****            |
| $\beta_1$               | SARS-CoV-2                 | 0.4433   | 0.3031 to 0.5836     | <0.0001 | ****            |
| $\beta_2$               | Sex: Female                | -0.1384  | -0.2741 to -0.002598 | 0.0459  | *               |
| $\beta_3$               | Race: White                | -0.1568  | -0.2912 to -0.02233  | 0.0227  | *               |
| $\beta_4$               | Autoimmune                 | 0.2258   | 0.05608 to 0.3955    | 0.0096  | **              |
| $\beta_5$               | Immunosuppressed           | -0.2659  | -0.4806 to -0.05128  | 0.0157  | *               |
| <b>Myeloperoxidase</b>  |                            |          |                      |         |                 |
| $\beta_0$               | Intercept                  | 1.064    | 0.9313 to 1.196      | <0.0001 | ****            |
| $\beta_1$               | SARS-CoV-2                 | 0.2047   | 0.04608 to 0.3633    | 0.012   | *               |
| $\beta_2$               | Race: Black                | 0.2063   | 0.02179 to 0.3909    | 0.0288  | *               |
| $\beta_3$               | Hypertension               | -0.189   | -0.3749 to -0.003120 | 0.0463  | *               |
| <b>B-2-Glycoprotein</b> |                            |          |                      |         |                 |
| $\beta_0$               | Intercept                  | 1.489    | 1.150 to 1.828       | <0.0001 | ****            |
| $\beta_1$               | SARS-CoV-2                 | 0.313    | 0.1142 to 0.5119     | 0.0023  | **              |
| $\beta_2$               | Age                        | 0.007024 | 0.0008989 to 0.01315 | 0.025   | *               |
| $\beta_3$               | HIV                        | 0.2434   | -0.01196 to 0.4988   | 0.0615  | ns              |
| $\beta_4$               | Heart Disease              | -0.2666  | -0.5333 to 0.0001302 | 0.0501  | ns              |
| $\beta_5$               | Lung Disease               | -0.1793  | -0.4331 to 0.07456   | 0.1642  | ns              |
| <b>PCNA</b>             |                            |          |                      |         |                 |
| $\beta_0$               | Intercept                  | 2.527    | 2.281 to 2.772       | <0.0001 | ****            |
| $\beta_1$               | Race: White                | -0.3416  | -0.6084 to -0.07482  | 0.0126  | *               |
| $\beta_2$               | HIV                        | -0.271   | -0.6189 to 0.07695   | 0.1254  | ns              |
| $\beta_3$               | Lung Disease               | -0.2565  | -0.5996 to 0.08668   | 0.1412  | ns              |
| $\beta_4$               | Autoimmune                 | -0.378   | -0.7094 to -0.04654  | 0.0258  | *               |
| <b>Sci-70</b>           |                            |          |                      |         |                 |
| $\beta_0$               | Intercept                  | 2.28     | 2.119 to 2.442       | <0.0001 | ****            |
| $\beta_1$               | SARS-CoV-2                 | 0.3295   | 0.1251 to 0.5339     | 0.0019  | **              |
| $\beta_2$               | Lung Disease               | -0.2229  | -0.4982 to 0.05242   | 0.1114  | ns              |
| $\beta_3$               | Hypertension               | 0.1747   | -0.06295 to 0.4123   | 0.1479  | ns              |
| <b>Jo-1</b>             |                            |          |                      |         |                 |
| $\beta_0$               | Intercept                  | 2.145    | 1.933 to 2.356       | <0.0001 | ****            |
| $\beta_1$               | SARS-CoV-2                 | 0.395    | 0.1446 to 0.6453     | 0.0023  | **              |
| $\beta_2$               | Ethnicity: Hispanic/Latino | 0.2746   | -0.06032 to 0.6096   | 0.1069  | ns              |
| $\beta_3$               | HIV                        | 0.2711   | -0.05906 to 0.6012   | 0.1064  | ns              |
| $\beta_4$               | Hypertension               | 0.2224   | -0.04317 to 0.4880   | 0.0997  | ns              |

| <b>Ku</b>    |              |          |                       |         |      |  |
|--------------|--------------|----------|-----------------------|---------|------|--|
| $\beta_0$    | Intercept    | 2.494    | 2.241 to 2.746        | <0.0001 | **** |  |
| $\beta_1$    | SARS-CoV-2   | 0.2811   | 0.04983 to 0.5124     | 0.0177  | *    |  |
| $\beta_2$    | Race: White  | -0.1801  | -0.4131 to 0.05294    | 0.1283  | ns   |  |
| $\beta_3$    | HIV          | -0.2162  | -0.5259 to 0.09346    | 0.169   | ns   |  |
| $\beta_4$    | Lung Disease | -0.2733  | -0.5639 to 0.01735    | 0.065   | ns   |  |
| $\beta_5$    | Hypertension | 0.2398   | -0.02294 to 0.5025    | 0.0732  | ns   |  |
| <b>PL-12</b> |              |          |                       |         |      |  |
| $\beta_0$    | Intercept    | 2.446    | 2.082 to 2.809        | <0.0001 | **** |  |
| $\beta_1$    | SARS-CoV-2   | 0.3867   | 0.1606 to 0.6128      | 0.001   | ***  |  |
| $\beta_2$    | Age          | -0.00584 | -0.01196 to 0.0002785 | 0.0612  | ns   |  |
| $\beta_3$    | Sex: Female  | -0.1595  | -0.3722 to 0.05321    | 0.14    | ns   |  |
| $\beta_4$    | HIV          | 0.2576   | -0.02764 to 0.5427    | 0.0762  | ns   |  |

**Supplemental Table 3.** Poisson multiple linear regression of  $\leq 30$  days PSO and pre-pandemic samples

| Parameter estimates | Variable          | Estimate | 95% CI (profile likelihood) | P value |
|---------------------|-------------------|----------|-----------------------------|---------|
| $\beta_0$           | Intercept         | 2.977    | 2.503 to 3.541              | <0.0001 |
| $\beta_1$           | SARS-CoV-2        | 1.551    | 1.254 to 1.919              | <0.0001 |
| $\beta_2$           | Female sex        | 0.813    | 0.647 to 1.022              | 0.0761  |
| $\beta_3$           | Heart disease     | 1.675    | 1.315 to 2.134              | <0.0001 |
| $\beta_4$           | Immunosuppression | 0.604    | 0.418 to 0.872              | 0.0072  |

**Supplemental Table 4.** Poisson multiple Linear Regression of  $\geq 90$  days PSO and pre-pandemic individuals

| Parameter estimates | Variable     | Estimate | 95% CI (profile likelihood) | P value |
|---------------------|--------------|----------|-----------------------------|---------|
| $\beta_0$           | Intercept    | 2.798    | 2.300 to 3.404              | <0.0001 |
| $\beta_1$           | SARS-CoV-2   | 1.662    | 1.342 to 2.059              | <0.0001 |
| $\beta_2$           | Black race   | 1.250    | 0.998 to 1.566              | 0.0526  |
| $\beta_3$           | Lung disease | 0.631    | 0.464 to 0.860              | 0.0035  |

Supplemental Figure 1.

A

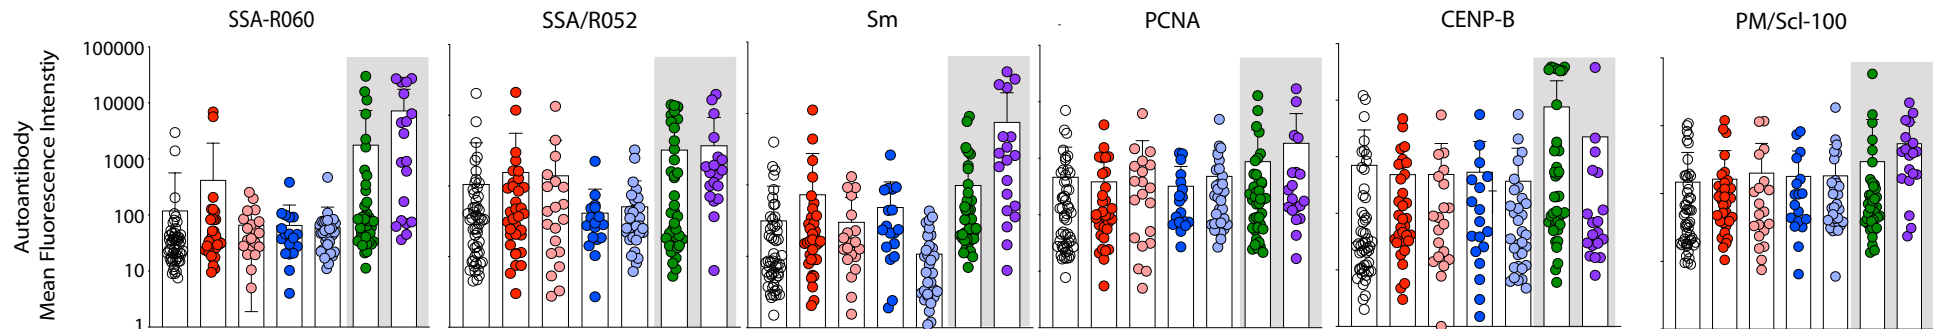

B

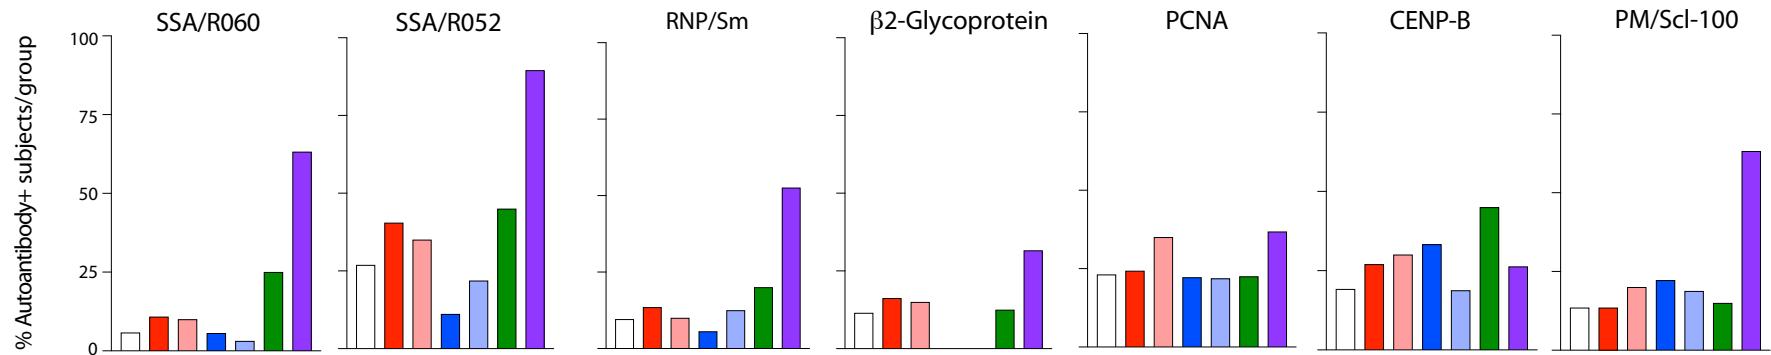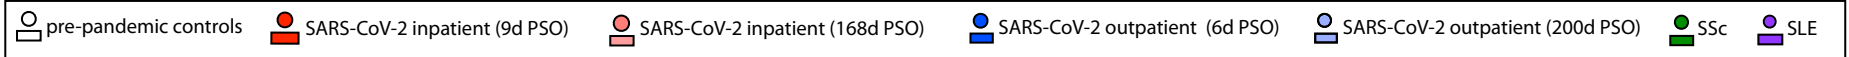



Supplemental Figure 3

A

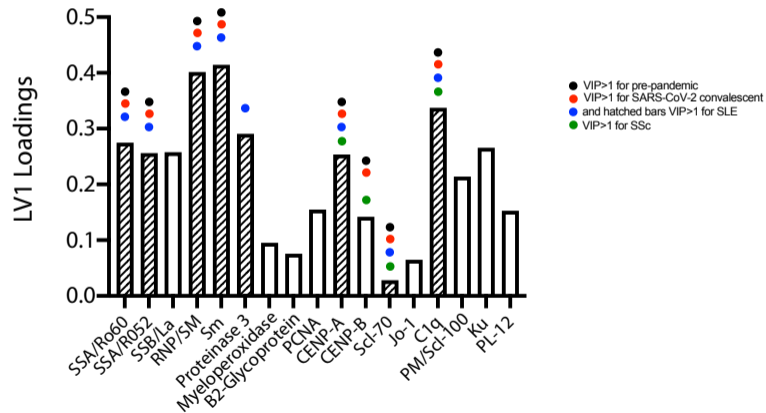

B

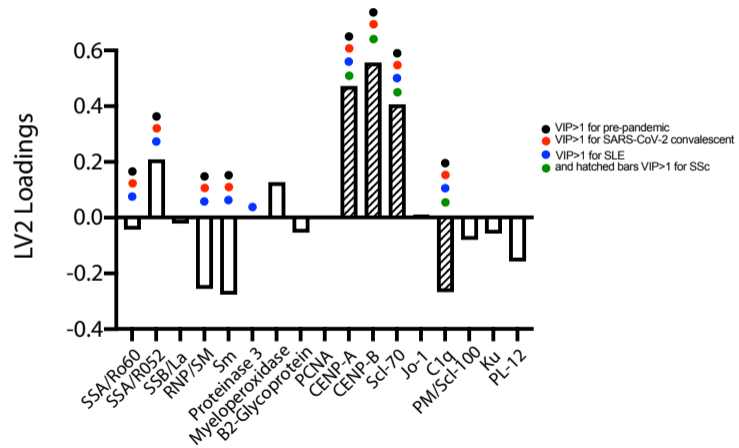

Supplemental Figure 4.

Autoantibody Mean Fluorescence Intensity

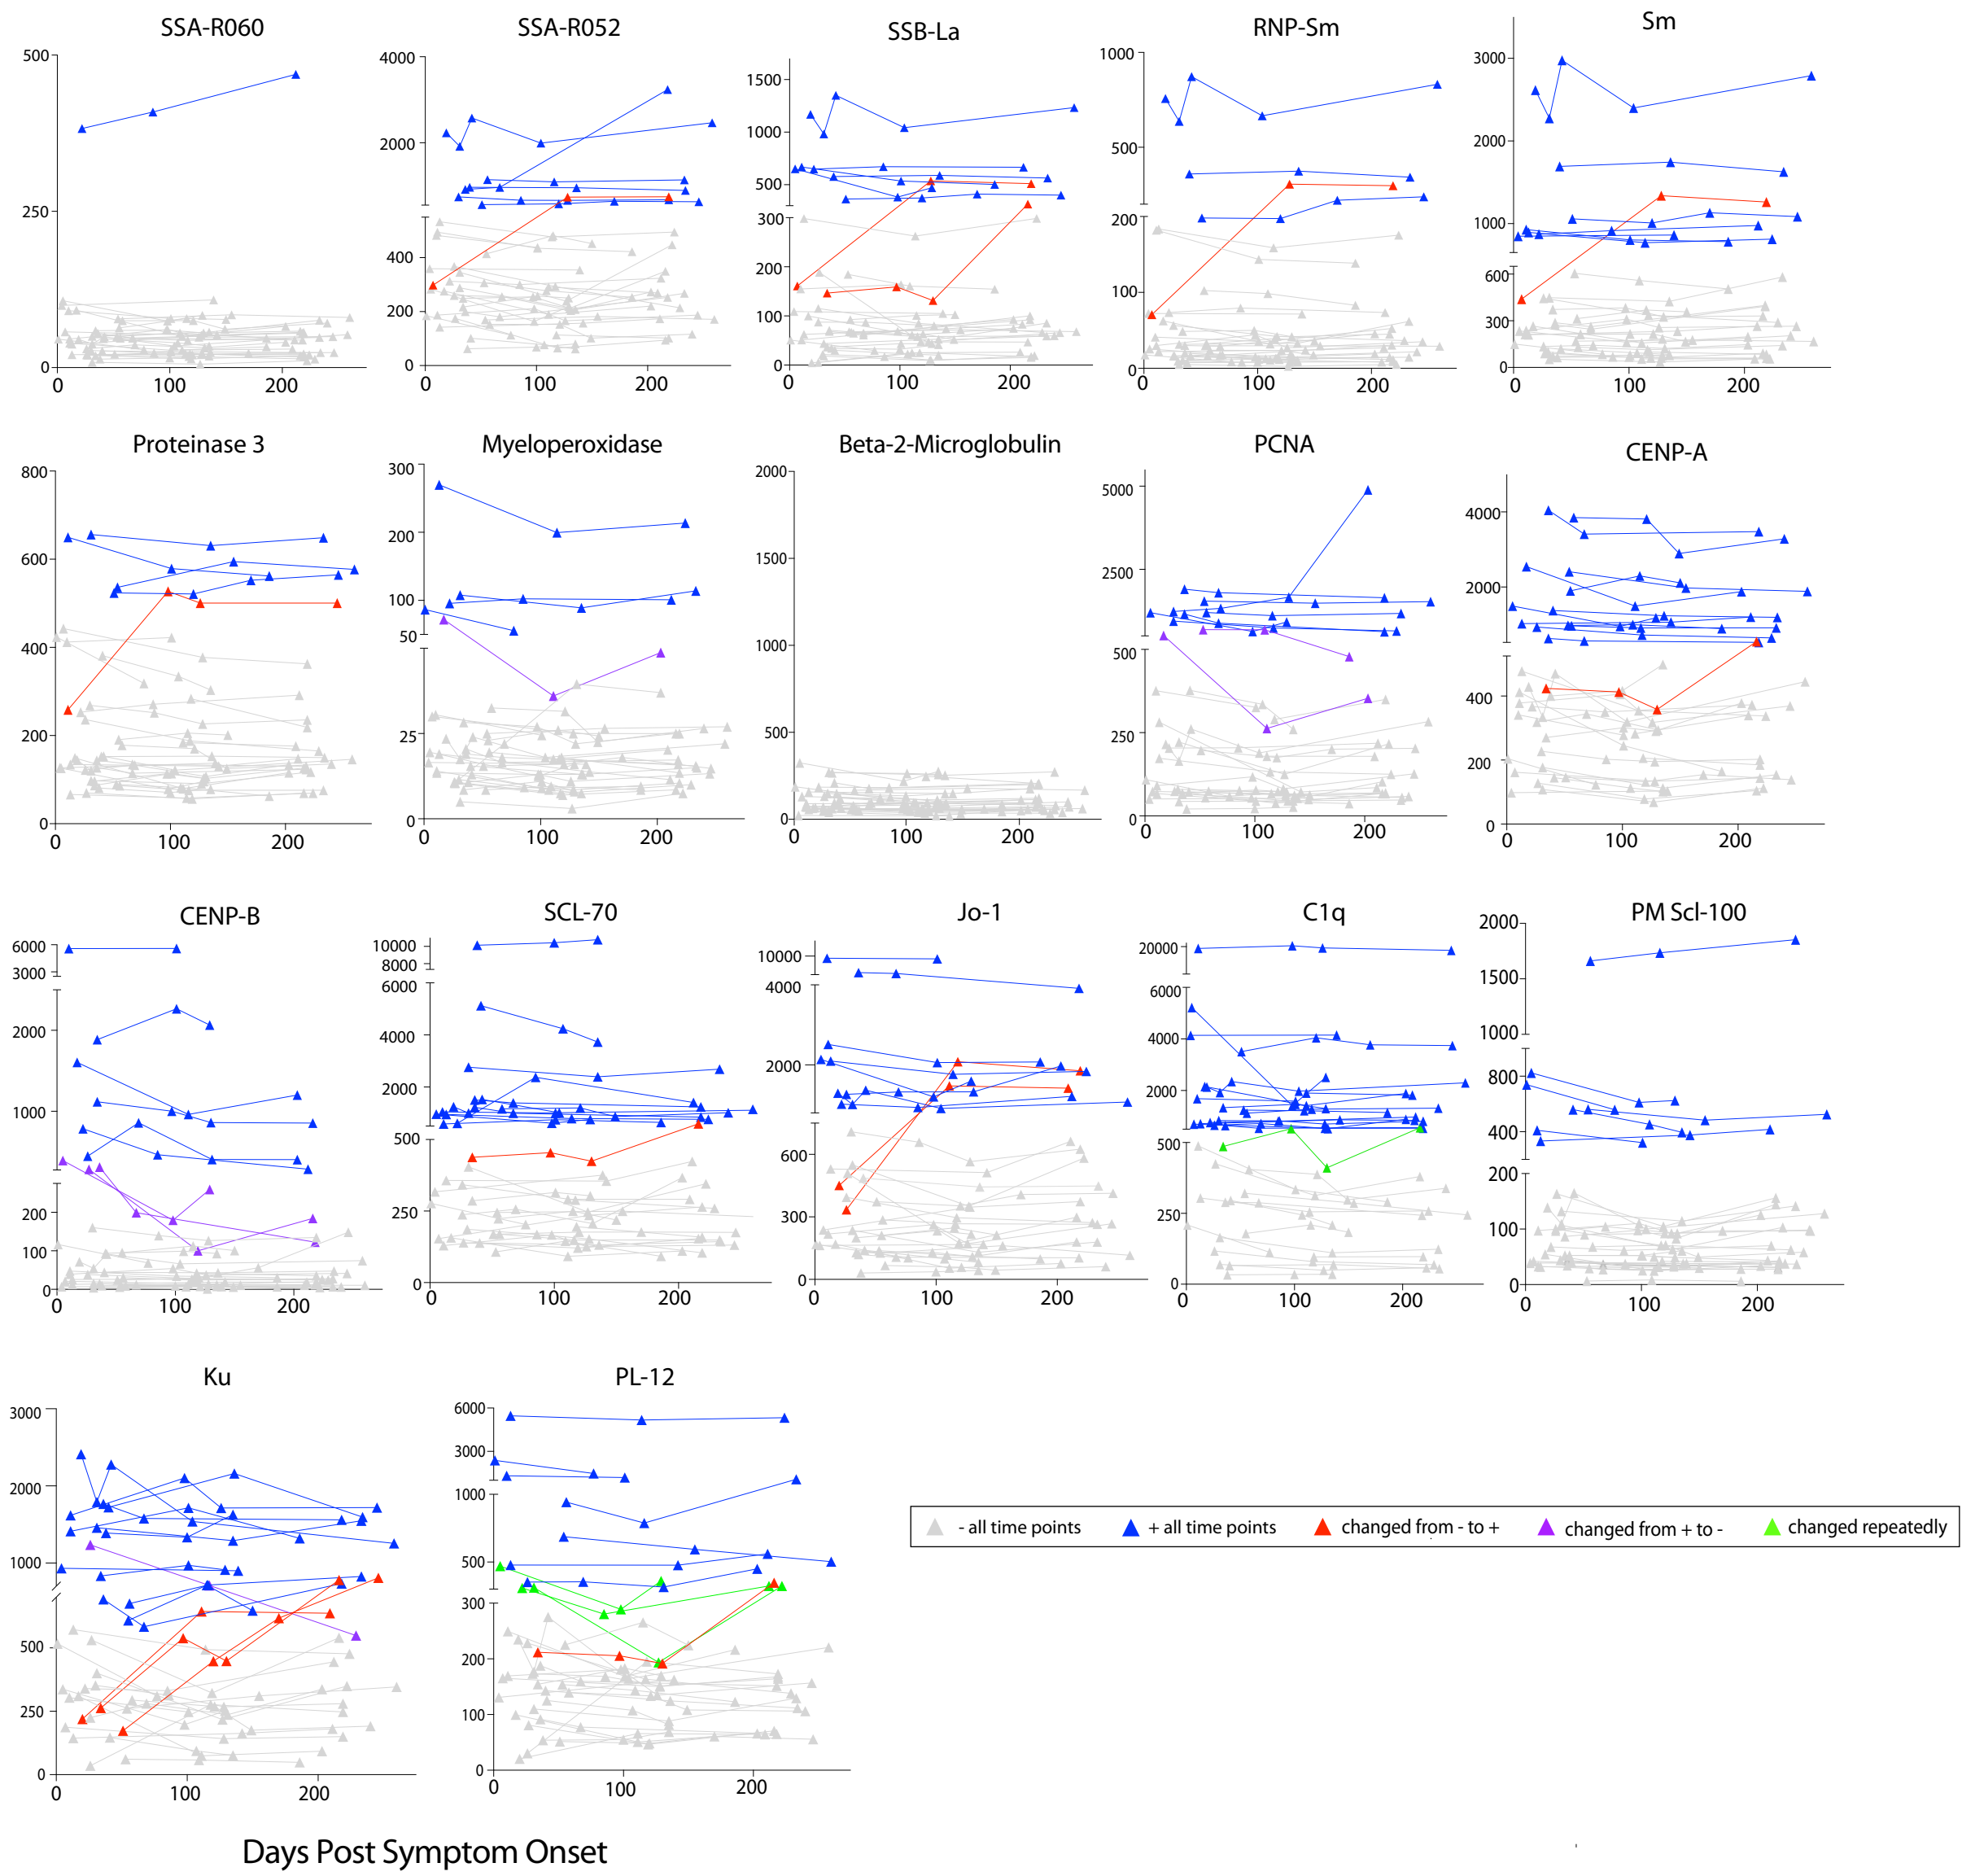

Supplemental Figure 5.

Autoantibody Mean Fluorescence Intensity

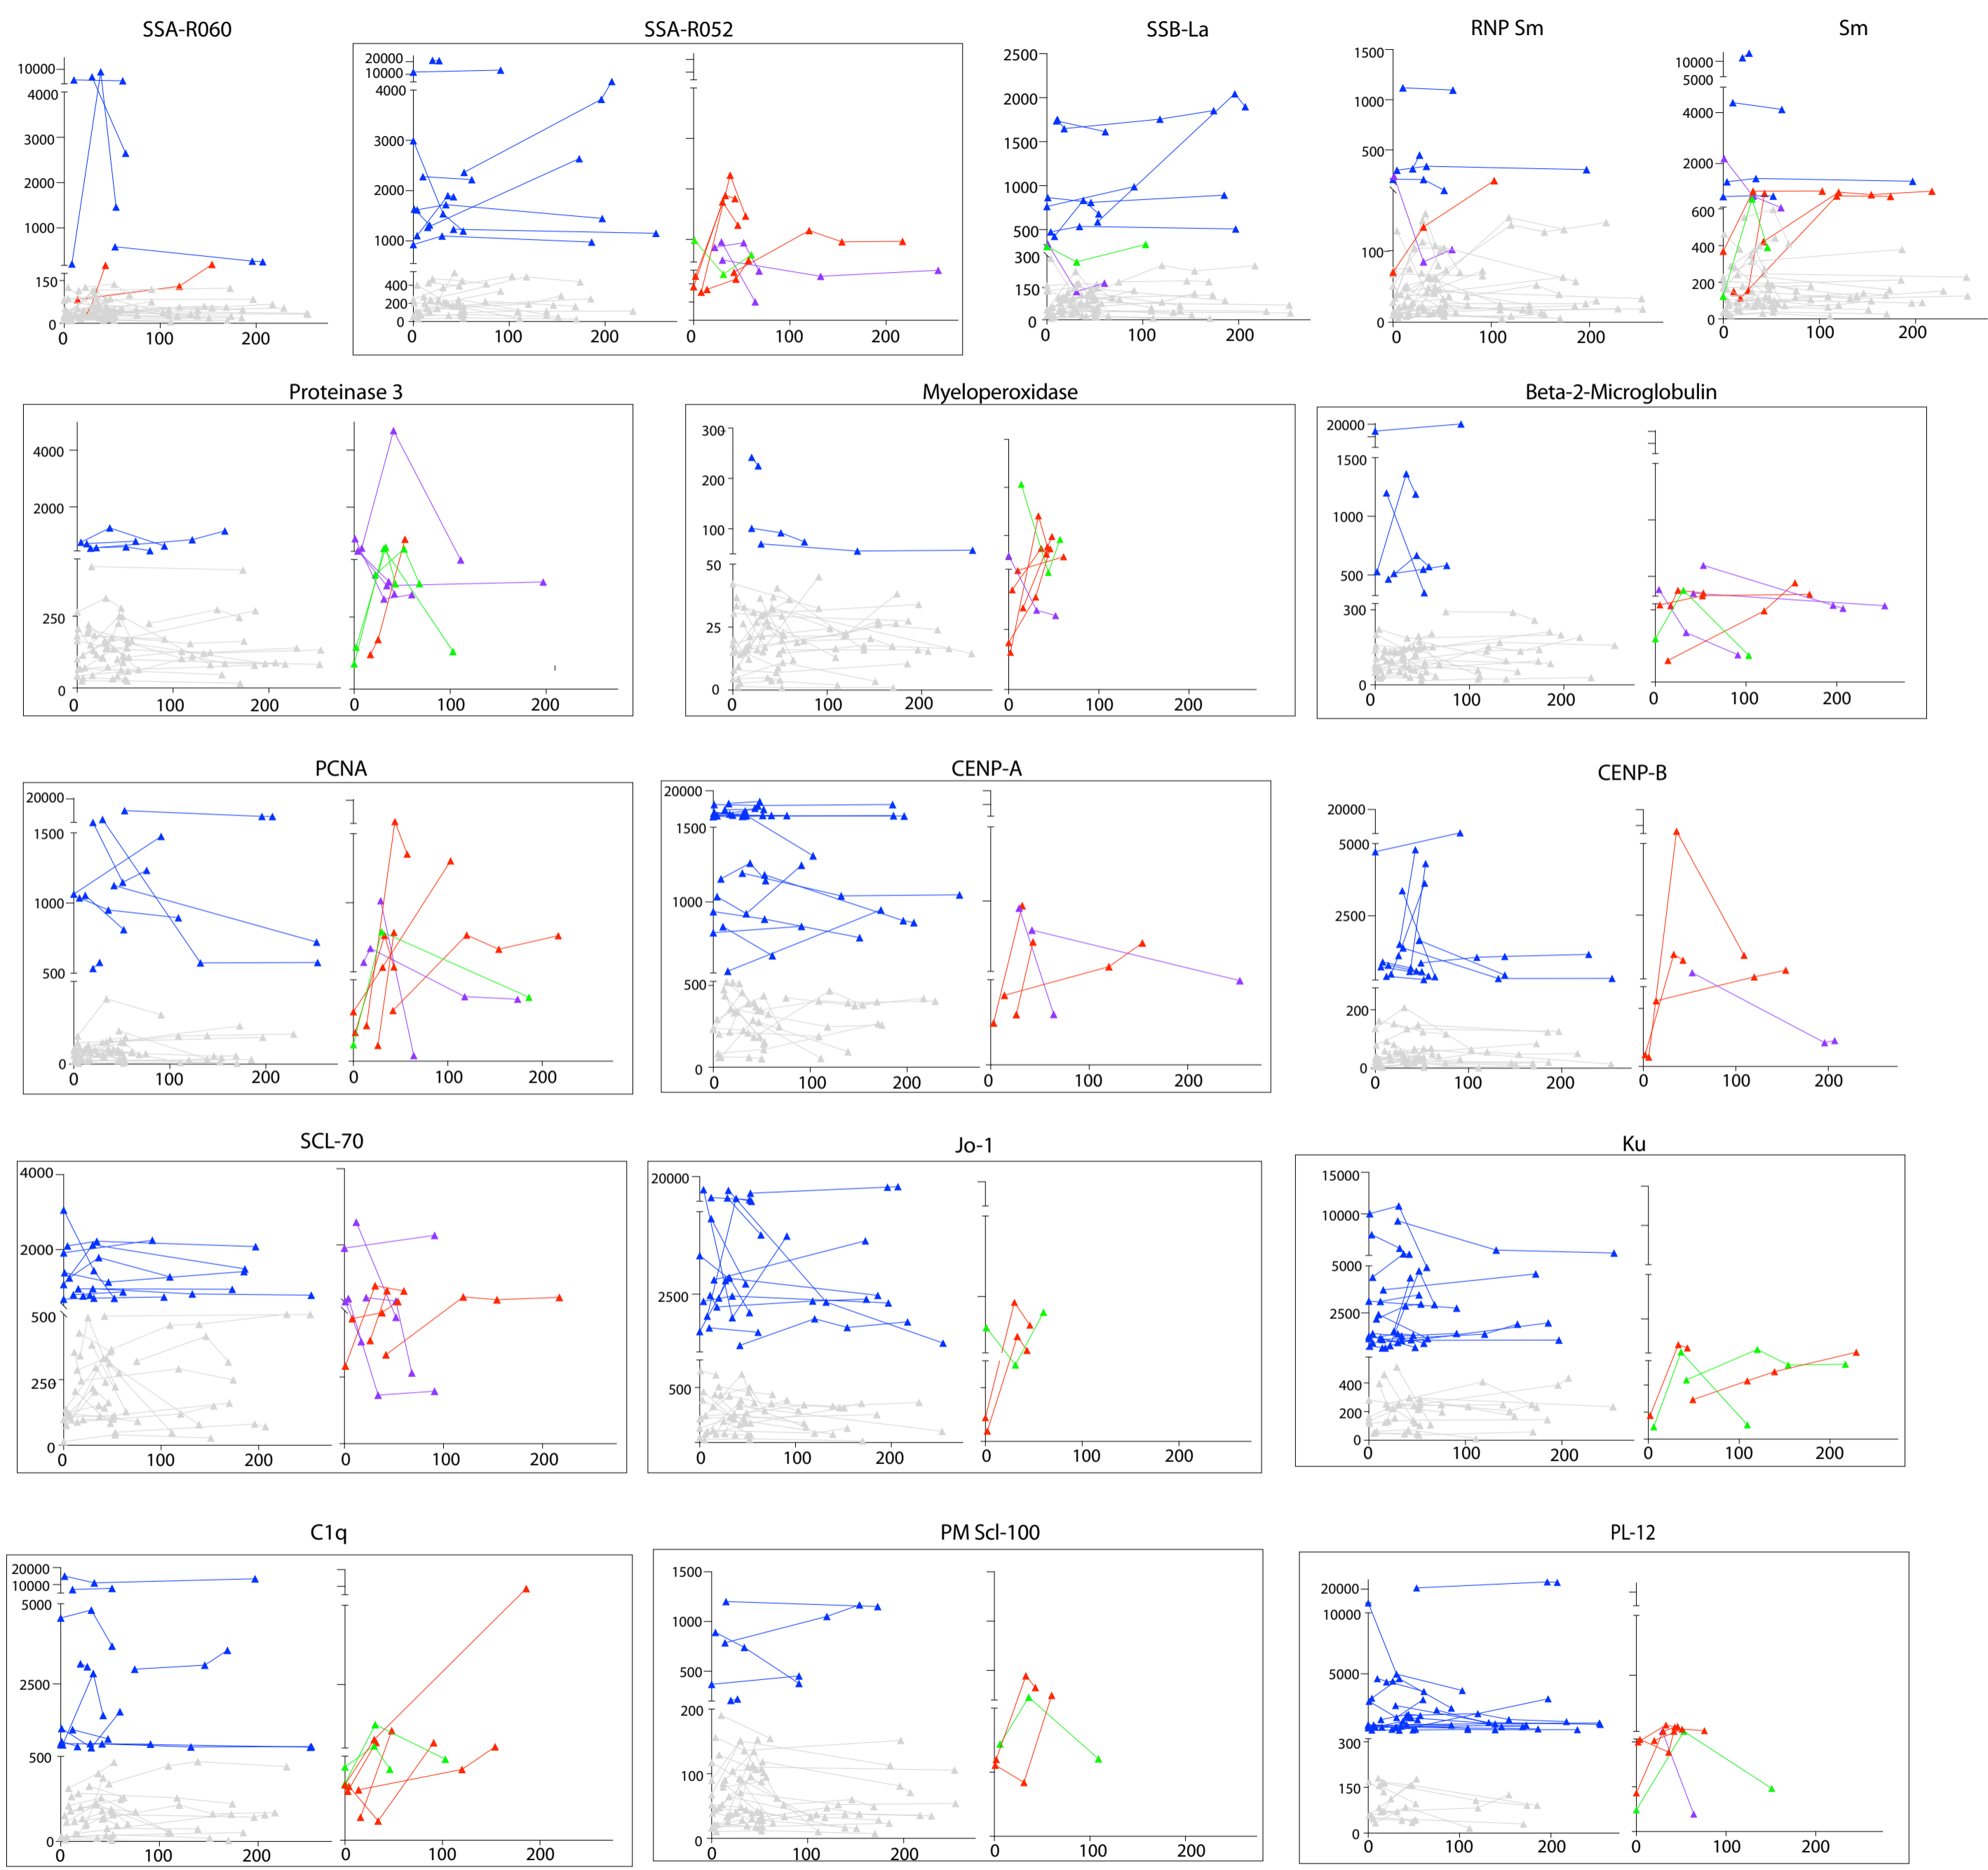

Days Post Symptom Onset

- all time points    + all time points    changed from - to +    changed from + to -    changed repeatedly
